# Supplementary material for: Oncological validation of bone turnover markers c-terminal telopeptide of type I collagen (1CTP) and peptides n-terminal propeptide of type I procollagen (P1NP) in patients with prostate cancer and bone metastases
Source: PubMed Central journal article supplement — Transl Androl Urol. 2021 Oct;10(10):4000–8. doi: 10.21037/tau-20-1120 (PMC8575559; doi:10.21037/tau-20-1120), 2021-10
Supplement: tau-10-10-4000-dss.pdf [file tau-10-10-4000-dss.pdf]

## Data Sharing Statement

|                     |                                                                                                                                                    |                                                            |
|---------------------|----------------------------------------------------------------------------------------------------------------------------------------------------|------------------------------------------------------------|
| <b>Article Info</b> | <a href="http://dx.doi.org/10.21037/tau-20-1120">http://dx.doi.org/10.21037/tau-20-1120</a>                                                        |                                                            |
| <b>Item</b>         | <b>Question</b>                                                                                                                                    | <b>Authors' Response<br/>(place "-" if not applicable)</b> |
| 1                   | Would you like to share data collected for your study to others?                                                                                   | No                                                         |
| 2                   | If not, would you like to share the reason for your decision?                                                                                      | -                                                          |
| 3                   | What data in particular will be shared?                                                                                                            | -                                                          |
| 4                   | Any other documents will be share? Such as study protocol, statistical analysis plan, informed consent form, clinical study report, analytic code. | -                                                          |
| 5                   | When will data availability begin?                                                                                                                 | -                                                          |
| 6                   | When will data availability end?                                                                                                                   | -                                                          |
| 7                   | To whom will you share the data?                                                                                                                   | -                                                          |
| 8                   | For what type of analysis or purpose?                                                                                                              | -                                                          |
| 9                   | How or where can the data/ documents be obtained?                                                                                                  | -                                                          |
| 10                  | Any other restrictions?                                                                                                                            | -                                                          |
